# Supplementary material for: Optimal tillage depths for enhancing rice yield, quality and lodging resistance in the rice production systems of northeast China
Source: PeerJ. 2023 Jul 19;11:e15739. doi: 10.7717/peerj.15739 (PMC10362852; doi:10.7717/peerj.15739)
Supplement: Supplemental Information 1 [file peerj-11-15739-s001.xlsx]

## Sheet: root
		Length(cm)	ProjArea(cm2)	SurfArea(cm2)	AvgDiam(mm)	RootVolume(cm3)	Tips
L14	1	15840	702.322	2206.41	0.4633	25.058	66628
	1	14995.3	655.343	2058.82	0.458965	23.425	72552
	1	15417.7	678.832	2132.61	0.461132	24.2415	69590
L17	2	20114.3	784.462	2464.46	0.398724	24.759	109416
	2	22150.9	912.276	2866	0.41755	30.157	112655
	2	21132.6	848.369	2665.23	0.408137	27.458	111036
L20	3	17297.7	727.933	2286.87	0.424789	24.84	73583
	3	18435	623.559	1958.97	0.343389	16.894	101408
	3	17866.4	675.746	2122.92	0.384089	20.867	87495.5
L23	4	18138.9	607.526	1908.6	0.335435	16.006	95370
	4	21167.4	699.378	2197.16	0.334894	18.301	130572
	4	19653.1	653.452	2052.88	0.335165	17.1535	112971
			95% confidence interval
		N	Mean value	Standard deviation	Standard error
Length	1	3	15417.7	422.344	243.841	c	154.177	154.18c
	2	3	21132.6	1018.33	587.936	a	211.326	211.33a
	3	3	17866.4	568.618	328.292	b	178.664	178.66b
	4	3	19653.1	1514.26	874.26	ab	196.531	196.53ab
ProjArea(cm2)	1	3	678.832	23.4894	13.5616	b	0.0678832	0.07b
	2	3	848.369	63.907	36.8967	a	0.0848369	0.08a
	3	3	675.746	52.1867	30.13	b	0.0675746	0.07b
	4	3	653.452	45.9257	26.5152	b	0.0653452	0.07b
SurfArea(cm2)	1	3	2132.61	73.7946	42.6053	b	0.213261	0.21b
	2	3	2665.23	200.77	115.914	a	0.266523	0.27a
	3	3	2122.92	163.95	94.6565	b	0.212292	0.21b
	4	3	2052.88	144.28	83.3	b	0.205288	0.21b
AvgDiam(mm)	1	3	0.4611	0.00217	0.00125	a	0.4611	0.46a
	2	3	0.4081	0.00941	0.00543	b	0.4081	0.41b
	3	3	0.3841	0.0407	0.0235	b	0.3841	0.38b
	4	3	0.3352	0.00027	0.00016	c	0.3352	0.34c
RootVolume(cm3)	1	3	24.2415	0.8165	0.47141	ab	24.2415	24.24ab
	2	3	27.458	2.699	1.55827	a	27.458	27.46a
	3	3	20.867	3.973	2.29381	bc	20.867	20.87bc
	4	3	17.1535	1.1475	0.66251	c	17.1535	17.15c
Tips	1	3	69590	2962	1710.11	b	69590	69590b
	2	3	111036	1619.5	935.019	a	111036	111036a
	3	3	87495.5	13912.5	8032.39	b	87495.5	87496b
	4	3	112971	17601	10161.9	a	112971	112971a

## Sheet: lodging
	First node bending force	Second node bending force	Third node bending force	First node bending moment	Second node bending moment	Third node bending moment	First node Lodging index	Second node Lodging index	Third node Lodging index	Center of gravity height	Fresh weight of single stem	Plant height	Stem diameter of First node	Internode length of First node	Stem diameter of Second node	Internode length of Second node	Stem diameter of Third node	Internode length of Third node	Root lengthLength(cm)	Root ProjArea(cm2)	Root SurfArea(cm2)	Root AvgDiam(mm)	RootVolume(cm3)	Tips
14cm（1）	42.7167	16.0333	12.9833	1604.88	1359.01	1057.19	37.5704	84.7616	81.4266	58.55	15.6617	108.5	4.57033	6.62167	4.53167	12.15	4.45583	15.6333	15840	702.322	2206.41	0.4633	25.058	66628
14cm（2）	40.7	16.4714	13.2714	1432.45	1222	931.181	35.1954	74.189	70.1643	56.5	14.56	102.714	5.47	4.02857	4.94143	11.8857	4.15714	15.9143	14995.3	655.343	2058.82	0.458965	23.425	72552
14cm（3）	41.7083	16.2524	13.1274	1518.67	1290.5	994.185	36.4116	79.404	75.7337	57.525	15.1108	105.607	5.02017	5.32512	4.6744	12.0179	4.30649	15.7738	15417.7	678.832	2132.61	0.461132	24.2415	69590
17cm（1）	60.4333	30.1167	16.2167	1453.44	1294.08	1039	24.0504	42.9689	64.07	57.4167	13.9517	107.083	5.69917	2.61667	5.25833	9.56667	4.49583	14.65	20114.3	784.462	2464.46	0.398724	24.759	109416
17cm（2）	50.2	20.9	17.4	1709.45	1539.42	1262.93	34.0528	73.6567	72.5825	60.25	16.805	104.5	5.8	2.3	5.4	8.3	5.1	13.25	22150.9	912.276	2866	0.41755	30.157	112655
17cm（3）	55.3167	25.5083	16.8083	1581.45	1416.75	1150.97	28.589	55.5407	68.476	58.8333	15.3783	105.792	5.74958	2.45833	5.32917	8.93333	4.79792	13.95	21132.6	848.369	2665.23	0.408137	27.458	111036
20cm（1）	42.7333	18.05	15.1	1418.94	1230.87	957.722	33.2044	68.1923	63.4253	57.25	14.6283	102	5.51667	3.41667	4.8975	11.4	4.43333	14.7667	17297.7	727.933	2286.87	0.424789	24.84	73583
20cm（2）	65.3286	24.3857	16.2	1798.89	1602.09	1295.03	27.5361	65.6979	79.9402	57.0714	17.6614	105.143	6.3	2.74286	5.42143	8.58571	4.78429	14.4857	18435	623.559	1958.97	0.343389	16.894	101408
20cm（3）	54.031	21.2179	15.65	1608.91	1416.48	1126.38	29.7776	66.7589	71.9729	57.1607	16.1449	103.571	5.90833	3.07976	5.15946	9.99286	4.60881	14.6262	17866.4	675.746	2122.92	0.384089	20.867	87495.5
23cm（1）	47.0857	17.8286	12.6857	1260.68	1107	865.156	26.7741	62.0915	68.1992	55.2571	13.2657	99.7143	5.56429	2.31429	4.90571	10.0857	4.49286	15.1571	18138.9	607.526	1908.6	0.335435	16.006	95370
23cm（2）	43.5429	15.1429	11.8143	1399.5	1214.83	964.97	32.1407	80.2249	81.6782	56.7714	14.32	101.143	5.72143	3.72857	4.91429	11.6857	4.4	13.4857	21167.4	699.378	2197.16	0.334894	18.301	130572
23cm（3）	45.3143	16.4857	12.25	1330.09	1160.92	915.063	29.3525	70.4196	74.699	56.0143	13.7929	100.429	5.64286	3.02143	4.91	10.8857	4.44643	14.3214	19653.1	653.452	2052.88	0.335165	17.1535	112971
			correlation
	Length(cm)	ProjArea(cm2)	SurfArea(cm2)	AvgDiam(mm)	RootVolume(cm3)	Tips
First node bending force	0.442	0.18	0.18	-0.383	-0.073	0.417
Second node bending force	0.439	0.438	0.438	-0.106	0.253	0.334
Third node bending force	0.415	.669*	.669*	0.139	0.562	0.157
First node bending moment	0.106	0.355	0.355	0.239	0.381	-0.042
Second node bending moment	0.251	0.425	0.425	0.129	0.371	0.092
Third node bending moment	0.37	0.482	0.482	0.044	0.362	0.207
First node Lodging index	-0.496	0.048	0.048	.694*	0.402	-0.572
Second node Lodging index	-0.385	-0.234	-0.234	0.275	-0.029	-0.338
Third node Lodging index	-0.062	-0.285	-0.285	-0.141	-0.309	0.098
Center of gravity height	0.339	.861**	.861**	0.509	.861**	0.042
Fresh weight of single stem	0.067	0.251	0.251	0.165	0.275	-0.064
Plant height	-0.118	0.409	0.409	.598*	.596*	-0.271
Stem diameter of First node	0.572	0.068	0.068	-.656*	-0.295	.627*
Internode length of First node	-.680*	-0.254	-0.254	.615*	0.142	-.650*
Stem diameter of Second node	.657*	0.464	0.464	-0.341	0.146	0.574
Internode length of Second node	-.668*	-0.467	-0.467	0.373	-0.133	-0.532
Stem diameter of Third node	.690*	.634*	.634*	-0.211	0.331	0.463
Internode length of Third node	-.951**	-.577*	-.577*	0.531	-0.093	-.866**
**. Was significantly correlated at the level of 0.01 (bilateral).
**. Was significantly correlated at the level of 0.05(bilateral).
											correlation
	First node bending force	Second node bending force	Third node bending force	First node bending moment	Second node bending moment	Third node bending moment	First node Lodging index	Second node Lodging index	Third node Lodging index	Center of gravity height	Fresh weight of single stem	Plant height	Stem diameter of First node	Internode length of First node	Stem diameter of Second node	Internode length of Second node	Stem diameter of Third node	Internode length of Third node	Root lengthLength(cm)	Root ProjArea(cm2)	Root SurfArea(cm2)	Root AvgDiam(mm)	RootVolume(cm3)	Tips
First node bending force	1	.886**	.711**	0.544	.645*	.692*	-.743**	-.696*	-0.102	0.162	0.472	0.348	.697*	-0.571	.817**	-.829**	.602*	-0.369	0.442	0.18	0.18	-0.383	-0.073	0.417
Second node bending force	.886**	1	.798**	0.389	0.495	0.548	-.711**	-.868**	-0.435	0.291	0.253	0.47	0.519	-0.552	.771**	-.753**	0.503	-0.294	0.439	0.438	0.438	-0.106	0.253	0.334
Third node bending force	.711**	.798**	1	.674*	.763**	.795**	-0.317	-0.549	-0.398	.646*	.609*	0.459	0.503	-0.509	.820**	-.810**	.765**	-0.408	0.415	.669*	.669*	0.139	0.562	0.157
First node bending moment	0.544	0.389	.674*	1	.984**	.955**	0.149	0.088	0.357	.696*	.976**	.655*	0.239	0.049	0.492	-0.504	.652*	-0.219	0.106	0.355	0.355	0.239	0.381	-0.042
Second node bending moment	.645*	0.495	.763**	.984**	1	.992**	0.007	-0.043	0.27	.698*	.957**	.598*	0.372	-0.122	.629*	-.645*	.756**	-0.344	0.251	0.425	0.425	0.129	0.371	0.092
Third node bending moment	.692*	0.548	.795**	.955**	.992**	1	-0.079	-0.113	0.235	.704*	.923**	0.557	0.44	-0.221	.699*	-.721**	.822**	-0.448	0.37	0.482	0.482	0.044	0.362	0.207
First node Lodging index	-.743**	-.711**	-0.317	0.149	0.007	-0.079	1	.872**	0.397	0.349	0.198	0.174	-.677*	.769**	-.607*	.624*	-0.259	0.334	-0.496	0.048	0.048	.694*	0.402	-0.572
Second node Lodging index	-.696*	-.868**	-0.549	0.088	-0.043	-0.113	.872**	1	.706*	0.094	0.195	-0.088	-0.507	.695*	-.621*	.607*	-0.242	0.187	-0.385	-0.234	-0.234	0.275	-0.029	-0.338
Third node Lodging index	-0.102	-0.435	-0.398	0.357	0.27	0.235	0.397	.706*	1	0.072	0.401	0.143	-0.166	0.505	-0.268	0.228	0.013	-0.064	-0.062	-0.285	-0.285	-0.141	-0.309	0.098
Center of gravity height	0.162	0.291	.646*	.696*	.698*	.704*	0.349	0.094	0.072	1	.612*	.664*	-0.111	0.095	0.316	-0.365	.658*	-0.377	0.339	.861**	.861**	0.509	.861**	0.042
Fresh weight of single stem	0.472	0.253	.609*	.976**	.957**	.923**	0.198	0.195	0.401	.612*	1	0.495	0.294	0.024	0.466	-0.473	.641*	-0.229	0.067	0.251	0.251	0.165	0.275	-0.064
Plant height	0.348	0.47	0.459	.655*	.598*	0.557	0.174	-0.088	0.143	.664*	0.495	1	-0.326	0.422	0.078	-0.132	0.231	0.179	-0.118	0.409	0.409	.598*	.596*	-0.271
Stem diameter of First node	.697*	0.519	0.503	0.239	0.372	0.44	-.677*	-0.507	-0.166	-0.111	0.294	-0.326	1	-.860**	.866**	-.735**	0.497	-.613*	0.572	0.068	0.068	-.656*	-0.295	.627*
Internode length of First node	-0.571	-0.552	-0.509	0.049	-0.122	-0.221	.769**	.695*	0.505	0.095	0.024	0.422	-.860**	1	-.817**	.784**	-0.529	.615*	-.680*	-0.254	-0.254	.615*	0.142	-.650*
Stem diameter of Second node	.817**	.771**	.820**	0.492	.629*	.699*	-.607*	-.621*	-0.268	0.316	0.466	0.078	.866**	-.817**	1	-.923**	.742**	-.635*	.657*	0.464	0.464	-0.341	0.146	0.574
Internode length of Second node	-.829**	-.753**	-.810**	-0.504	-.645*	-.721**	.624*	.607*	0.228	-0.365	-0.473	-0.132	-.735**	.784**	-.923**	1	-.878**	.606*	-.668*	-0.467	-0.467	0.373	-0.133	-0.532
Stem diameter of Third node	.602*	0.503	.765**	.652*	.756**	.822**	-0.259	-0.242	0.013	.658*	.641*	0.231	0.497	-0.529	.742**	-.878**	1	-.709**	.690*	.634*	.634*	-0.211	0.331	0.463
Internode length of Third node	-0.369	-0.294	-0.408	-0.219	-0.344	-0.448	0.334	0.187	-0.064	-0.377	-0.229	0.179	-.613*	.615*	-.635*	.606*	-.709**	1	-.951**	-.577*	-.577*	0.531	-0.093	-.866**
Root lengthLength(cm)	0.442	0.439	0.415	0.106	0.251	0.37	-0.496	-0.385	-0.062	0.339	0.067	-0.118	0.572	-.680*	.657*	-.668*	.690*	-.951**	1	.618*	.618*	-0.544	0.108	.923**
Root ProjArea(cm2)	0.18	0.438	.669*	0.355	0.425	0.482	0.048	-0.234	-0.285	.861**	0.251	0.409	0.068	-0.254	0.464	-0.467	.634*	-.577*	.618*	1	1.000**	0.313	.848**	0.329
Root SurfArea(cm2)	0.18	0.438	.669*	0.355	0.425	0.482	0.048	-0.234	-0.285	.861**	0.251	0.409	0.068	-0.254	0.464	-0.467	.634*	-.577*	.618*	1.000**	1	0.313	.848**	0.329
Root AvgDiam(mm)	-0.383	-0.106	0.139	0.239	0.129	0.044	.694*	0.275	-0.141	0.509	0.165	.598*	-.656*	.615*	-0.341	0.373	-0.211	0.531	-0.544	0.313	0.313	1	.765**	-.727**
Root Volume(cm3)	-0.073	0.253	0.562	0.381	0.371	0.362	0.402	-0.029	-0.309	.861**	0.275	.596*	-0.295	0.142	0.146	-0.133	0.331	-0.093	0.108	.848**	.848**	.765**	1	-0.201
Root Tips	0.417	0.334	0.157	-0.042	0.092	0.207	-0.572	-0.338	0.098	0.042	-0.064	-0.271	.627*	-.650*	0.574	-0.532	0.463	-.866**	.923**	0.329	0.329	-.727**	-0.201	1
**. Was significantly correlated at the level of 0.01 (bilateral).
**. Was significantly correlated at the level of 0.05(bilateral).
	First node Lodging index	First node bending force	Second node Lodging index	Second node bending force	Third node Lodging index	Third node bending force
Plant height	0.174	0.348	-0.088	0.47	0.143	0.459
Center of gravity height	0.349	0.162	0.094	0.291	0.072	0.646*
Fresh weight of single stem	0.198	0.472	0.195	0.253	0.401	0.609*
Stem diameter of First node	0.769**	-0.571	0.695*	-0.552	0.505	-0.509
Internode length of First node	-.677*	0.697*	-0.507	0.519	-0.166	0.503
Stem diameter of Second node	0.624*	-.829**	0.607*	-.753**	0.228	-.810**
Internode length of Second node	-.607*	0.817**	-.621*	0.771**	-0.268	0.820**
Stem diameter of Third node	0.334	-0.369	0.187	-0.294	-0.064	-0.408
Internode length of Third node	-0.259	0.602*	-0.242	0.503	0.013	0.765**
Root lengthLength(cm)	-0.496	0.442	-0.385	0.439	-0.062	0.415
Root ProjArea(cm2)	0.048	0.18	-0.234	0.438	-0.285	0.669*
Root SurfArea(cm2)	0.048	0.18	-0.234	0.438	-0.285	0.669*
Root AvgDiam(mm)	0.694*	-0.383	0.275	-0.106	-0.141	0.139
Root Volume(cm3)	0.402	-0.073	-0.029	0.253	-0.309	0.562
Root Tips	-0.572	0.417	-0.338	0.334	0.098	0.157
**. Was significantly correlated at the level of 0.01 (bilateral).
**. Was significantly correlated at the level of 0.05(bilateral).

## Sheet: yield
	Y	S	YS	yield	yield（t/hm2)
F23	Y1	S4	Y1S4	0.985	9.85492
F23	Y1	S4	Y1S4	0.96	9.6048
F23	Y1	S4	Y1S4	1.01	10.1051
F20	Y1	S3	Y1S3	1.005	10.055
F20	Y1	S3	Y1S3	1	10.005
F20	Y1	S3	Y1S3	0.98	9.8049
F17	Y1	S2	Y1S2	1.07	10.7053
F17	Y1	S2	Y1S2	1.05	10.5053
F17	Y1	S2	Y1S2	1.03	10.3051
F14	Y1	S1	Y1S1	0.97	9.70485
F14	Y1	S1	Y1S1	0.96	9.6048
F14	Y1	S1	Y1S1	0.98	9.8049
F23	Y2	S4	Y2S4	1	10.005
F23	Y2	S4	Y2S4	1.03	10.3051
F23	Y2	S4	Y2S4	1.01	10.1051
F20	Y2	S3	Y2S3	1.04	10.4052
F20	Y2	S3	Y2S3	1	10.005
F20	Y2	S3	Y2S3	1.02	10.2051
F17	Y2	S2	Y2S2	1.05	10.5053
F17	Y2	S2	Y2S2	1.065	10.6553
F17	Y2	S2	Y2S2	1.045	10.4552
F14	Y2	S1	Y2S1	0.955	9.55477
F14	Y2	S1	Y2S1	0.94	9.4047
F14	Y2	S1	Y2S1	0.92	9.2046

## Sheet: photosynthetic
	Y	S	YS	Photo	Cond	Ci	Trmmol/m2s
F23	Y1	S4	Y1S4	14.7116	0.534853	305.319	5.1344
F23	Y1	S4	Y1S4	14.9717	0.559153	305.932	5.27012
F23	Y1	S4	Y1S4	16.6516	0.6036	301.593	5.43304
F20	Y1	S3	Y1S3	15.1191	0.530388	303.007	5.11126
F20	Y1	S3	Y1S3	15.8648	0.640924	308.637	5.40727
F20	Y1	S3	Y1S3	16.6031	0.670229	307.635	5.55978
F17	Y1	S2	Y1S2	15.6059	0.644105	309.665	5.1343
F17	Y1	S2	Y1S2	14.4892	0.552336	306.626	5.17217
F17	Y1	S2	Y1S2	14.9451	0.662876	314.469	5.65641
F14	Y1	S1	Y1S1	12.846	0.527316	312.035	4.9664
F14	Y1	S1	Y1S1	13.5915	0.585823	312.902	5.13354
F14	Y1	S1	Y1S1	13.7339	0.811488	322.856	5.74066
F23	Y2	S4	Y2S4	15.3246	0.558459	305.335	5.34833
F23	Y2	S4	Y2S4	15.5955	0.583894	305.949	5.48971
F23	Y2	S4	Y2S4	16.9914	0.616704	301.602	5.54391
F20	Y2	S3	Y2S3	15.4276	0.541819	303.016	5.21557
F20	Y2	S3	Y2S3	16.1886	0.65489	308.646	5.51762
F20	Y2	S3	Y2S3	16.6031	0.670229	307.635	5.55978
F17	Y2	S2	Y2S2	16.2562	0.672858	309.682	5.34823
F17	Y2	S2	Y2S2	15.7491	0.603586	306.662	5.62192
F17	Y2	S2	Y2S2	15.6402	0.696463	314.492	5.91949
F14	Y2	S1	Y2S1	12.846	0.527316	312.035	4.9664
F14	Y2	S1	Y2S1	13.0687	0.562087	312.889	4.93609
F14	Y2	S1	Y2S1	13.4646	0.794339	322.85	5.62809

## Sheet: RVA
	Y	S	YS	Peak 1	Trough 1	Breakdown	Final Visc	Setback	Peak Time	Pasting Temp
F23	Y1	S4	Y1S4	2604	1621	983	2655	51	6.27	72.1	F23
F23	Y1	S4	Y1S4	2534	1619	915	2650	116	6.33	72.85	F23
F23	Y1	S4	Y1S4	2569	1620	949	2652.5	83.5	6.3	72.475	F23
F20	Y1	S3	Y1S3	2697	1725	972	2803	106	6.33	71.95	F20
F20	Y1	S3	Y1S3	2665	1657	1008	2712	47	6.27	72.05	F20
F20	Y1	S3	Y1S3	2766	1776	990	2832	66	6.33	72	F20
F17	Y1	S2	Y1S2	2569	1697	872	2721	152	6.4	72.05	F17
F17	Y1	S2	Y1S2	2563	1721	842	2728	165	6.4	72.8	F17
F17	Y1	S2	Y1S2	2688	1740	948	2834	146	6.33	73	F17
F14	Y1	S1	Y1S1	2719	1746	973	2861	142	6.33	72	F14
F14	Y1	S1	Y1S1	2833	1869	964	3001	168	6.33	72.2	F14
F14	Y1	S1	Y1S1	2649	1646	1003	2794	145	6.27	72.1	F14
F23	Y2	S4	Y2S4	2709	1794	915	2810	101	6.27	72.85	F23
F23	Y2	S4	Y2S4	2588	1627	961	2683	95	6.27	72	F23
F23	Y2	S4	Y2S4	2650	1711	938	2747	98	6.27	72.43	F23
F20	Y2	S3	Y2S3	2738	1720	1018	2817	79	6.2	72	F20
F20	Y2	S3	Y2S3	2618	1665	953	2737	119	6.33	72.05	F20
F20	Y2	S3	Y2S3	2770	1792	978	2878	108	6.33	72.15	F20
F17	Y2	S2	Y2S2	2781	1893	888	2946	165	6.47	72.85	F17
F17	Y2	S2	Y2S2	2745	1806	939	2912	167	6.33	72	F17
F17	Y2	S2	Y2S2	2769	1803	966	2903	134	6.27	72.05	F17
F14	Y2	S1	Y2S1	2736	1732	1004	2824	88	6.27	71.2	F14
F14	Y2	S1	Y2S1	2719	1717	1002	2776	57	6.27	71.15	F14
F14	Y2	S1	Y2S1	2692	1713	979	2814	122	6.33	72.85	F14
